# Supplementary material for: Sample preparation for cadmium quantification in sunflower (Heliánthus ánnuus) seeds using anodic stripping voltammetry
Source: Royal Society of Chemistry journal article supplement (doi:10.1039/c5ay02275d), 2015-11-19
Supplement: c5ay02275d1.pdf [file c5ay02275d1.pdf]

### Electronic Supplementary Information

#### Sample preparation for cadmium quantification in sunflower (*Helianthus ánnuus*) seeds using stripping voltammetry

Ekaterina A. Zubakina, Nikolay D. Solovyev\*, Elena S. Savinkova, Nina I. Slesar'  
Institute of Chemistry, Saint Petersburg State University, 198504, Saint Petersburg, Russia

\* Corresponding author: [n.solovyev@spbu.ru](mailto:n.solovyev@spbu.ru) (Nikolay Solovyev)

**Table S1**

Optimization of microwave-assisted digestion parameters (pressure 2.0 MPa, reagent quantities 5 mL HNO<sub>3</sub> and 1 mL H<sub>2</sub>O<sub>2</sub>)

| Power, W | t, min | Mass fraction of Cd, $\mu\text{g} \cdot \text{g}^{-1}$ |                                                            | Spike recovery, % |
|----------|--------|--------------------------------------------------------|------------------------------------------------------------|-------------------|
|          |        | Sample                                                 | Sample + spiking<br>$0.25 \mu\text{g} \cdot \text{g}^{-1}$ |                   |
| 400      | 18     | ID                                                     | –                                                          | –                 |
| 600      | 18     | ID                                                     | –                                                          | –                 |
| 1000     | 18     | 0.11±0.05                                              | 0.29±0.09                                                  | 72                |
| 700      | 19     | 0.06±0.01                                              | 0.25±0.09                                                  | 76                |
| 800      | 24     | 0.13±0.03                                              | 0.35±0.07                                                  | 88                |
| 800      | 30     | 0.19±0.02                                              | 0.43±0.05                                                  | 96                |

ID – incomplete decomposition (particles or inclusions, turbidity or opalescence)

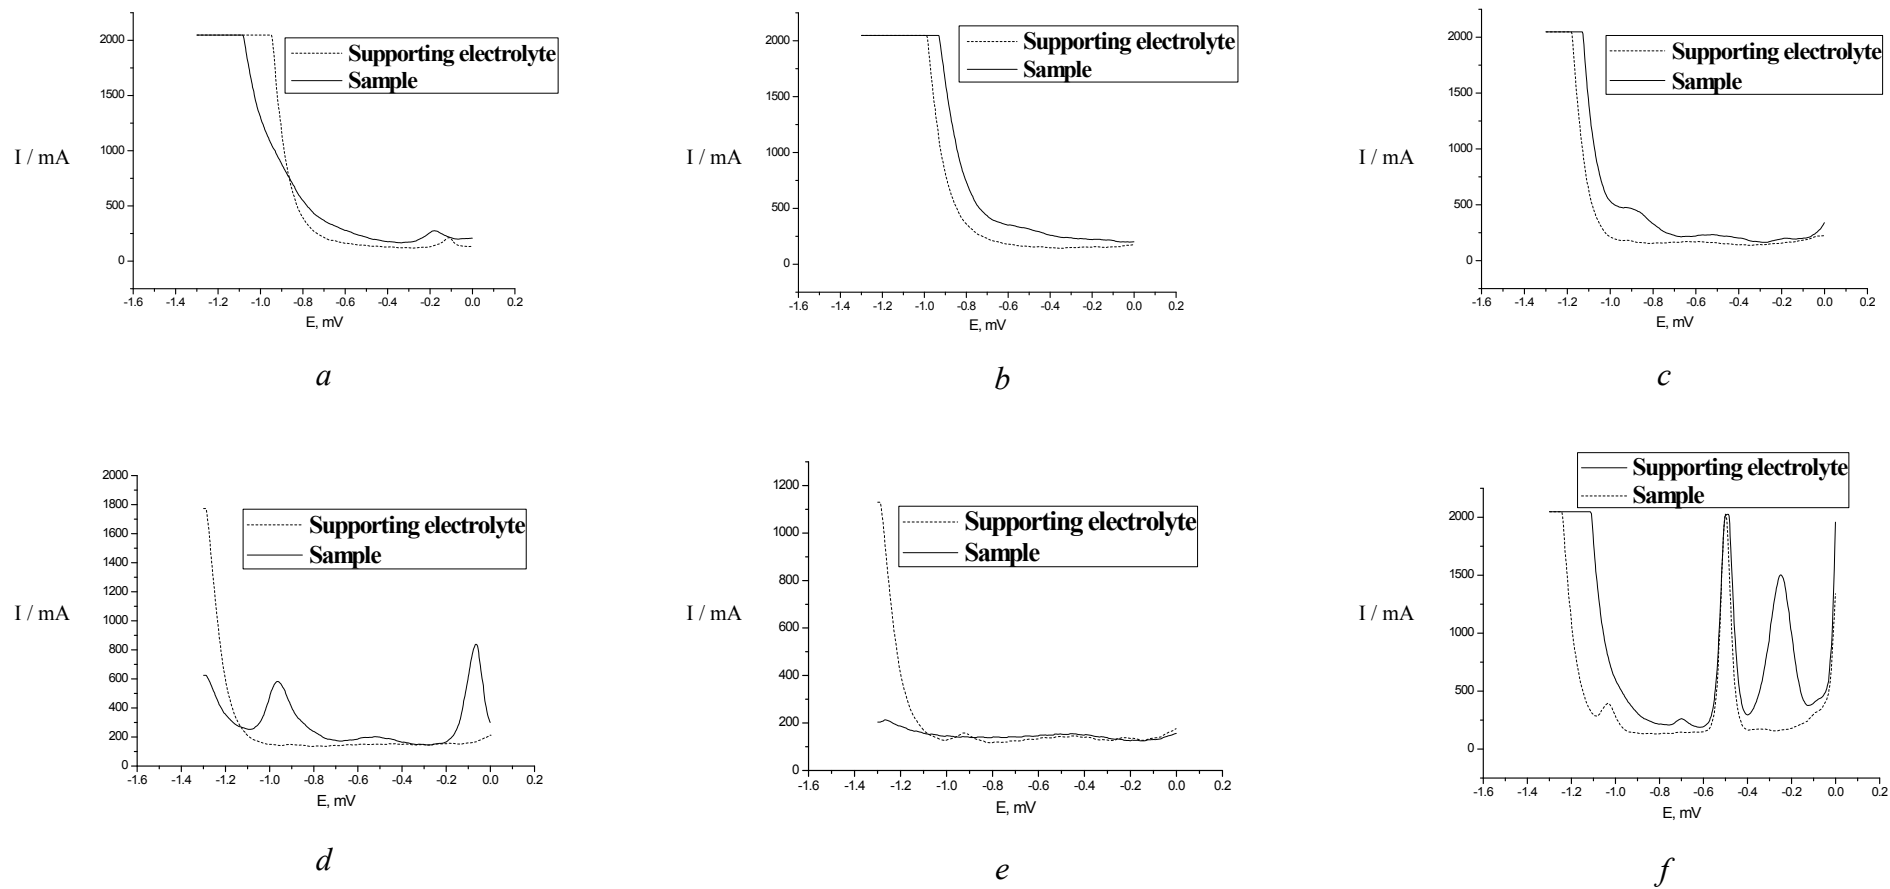

**Fig. S1.** Voltammograms for different supporting electrolytes – (a) 6M HCl and 3.5 M NaCl; (b) 1M HNO<sub>3</sub> and 0.01M Hg(NO<sub>3</sub>)<sub>2</sub>; (c) acetate buffer (pH = 5.6); (d) 0.5M HCl; (e) 1M HCl and 0.01M Hg(NO<sub>3</sub>)<sub>2</sub>; (f) 1M HCl, 0.01M Hg(NO<sub>3</sub>)<sub>2</sub> and 3.5M KCl
